# Supplementary material for: Value-based evaluation of dialysis versus conservative care in older patients with advanced chronic kidney disease: a cohort study
Source: Springer Nature journal article supplement (doi:10.1186/s12882-018-1004-4), 2018-08-16
Supplement: MOESM2 [file 16041428]

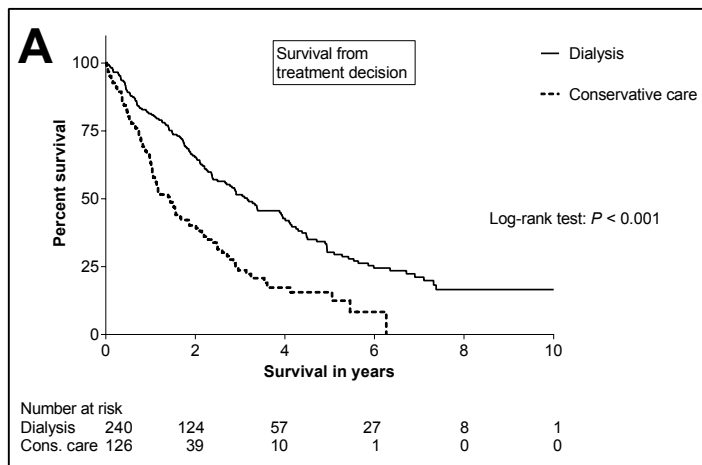

### Age 70-80 years

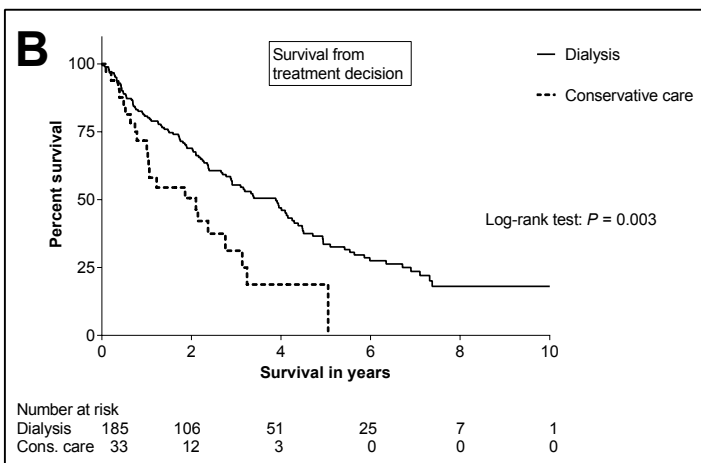

### Age $\geq 80$ years

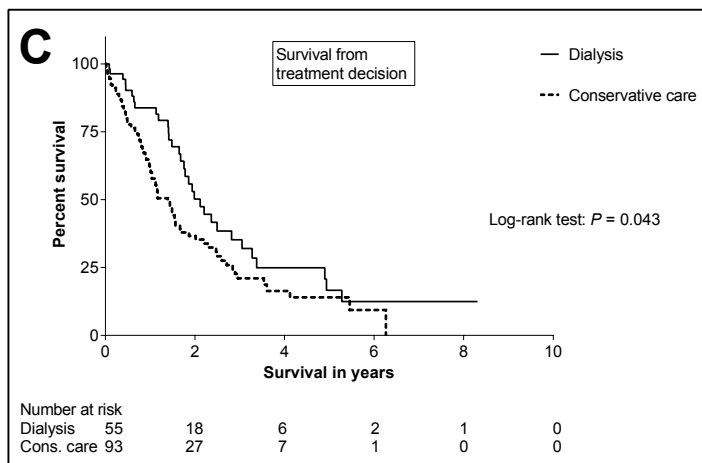

### No or intermediate comorbidity

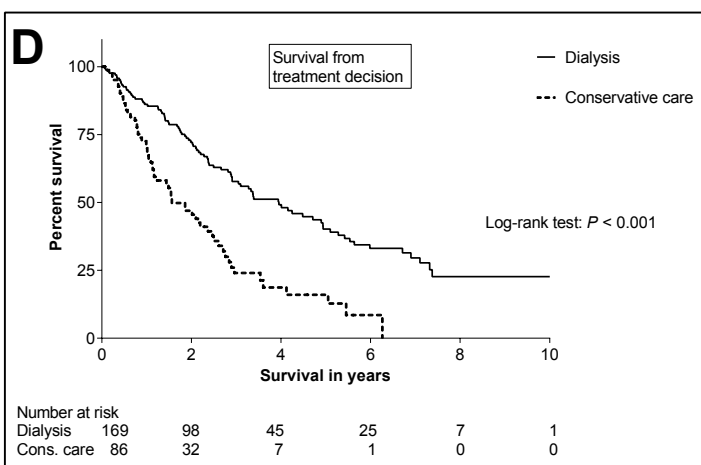

### Severe comorbidity

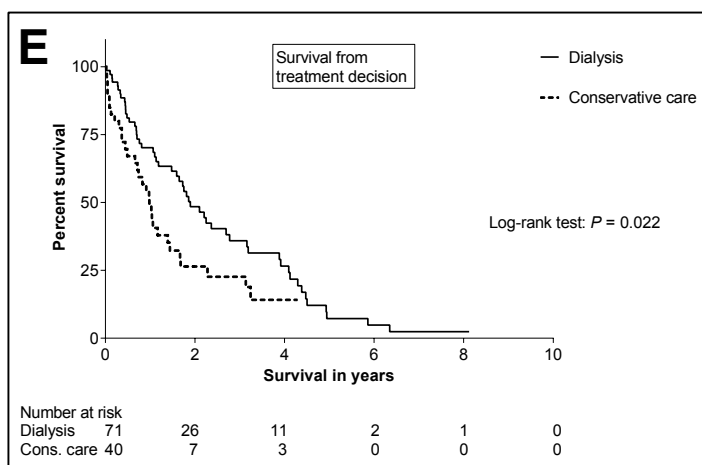

**Additional Figure 1. Kaplan-Meier survival curves comparing patients  $\geq 70$  years choosing dialysis or conservative care, from treatment decision:** overall comparison of both groups (part A; median survival:3.2 [1.5-6.0] versus 1.4 [0.7-2.9] years); after stratification of age (B and C); after stratification of Davies comorbidity scores with no and intermediate comorbidity taken together versus severe comorbidity (D and E).
