# Supplementary material for: Value-based evaluation of dialysis versus conservative care in older patients with advanced chronic kidney disease: a cohort study
Source: Springer Nature journal article supplement (doi:10.1186/s12882-018-1004-4), 2018-08-16
Supplement: MOESM4 [file 16041428]

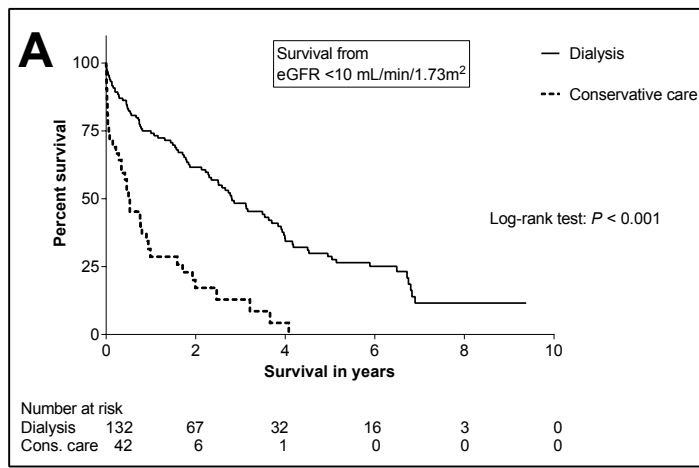

### Age 70-80 years

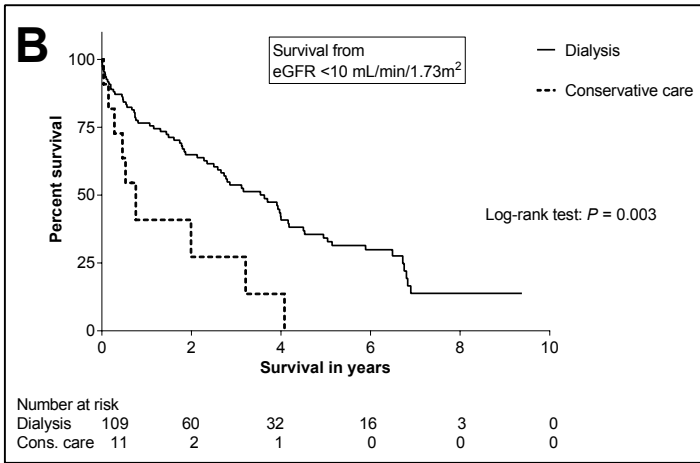

### Age ≥80 years

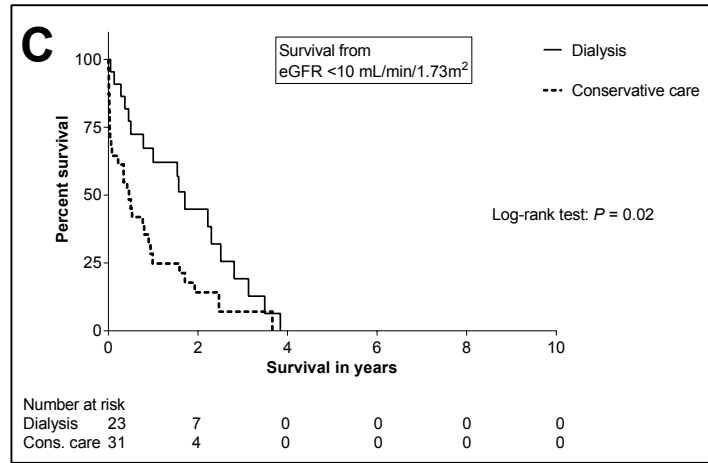

### No or intermediate comorbidity

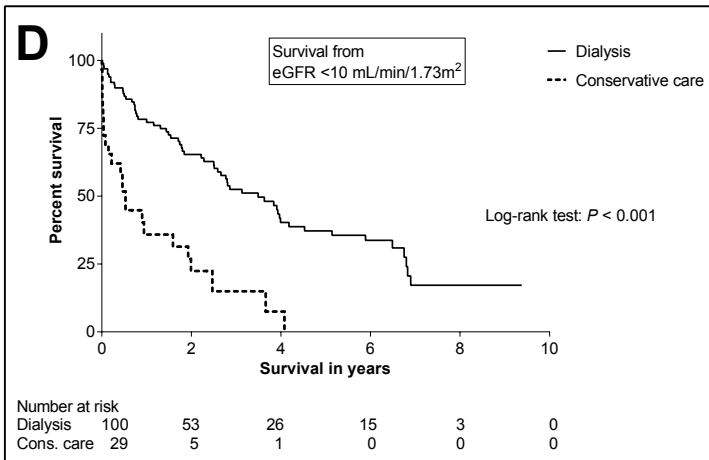

### Severe comorbidity

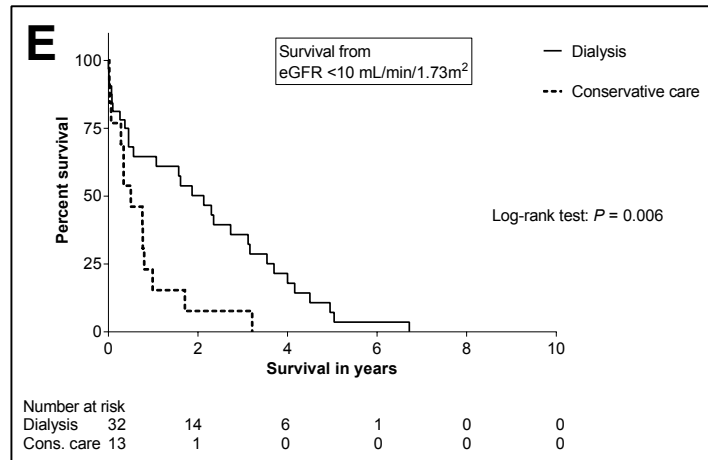

**Additional Figure 3. Kaplan-Meier survival curves comparing patients ≥70 years choosing dialysis or conservative care, from eGFR <10 mL/min/1.73m<sup>2</sup>:** overall comparison of both groups (part A; median survival: 2.8 [0.8-6.5] versus 0.5 [0.1-1.7] years); after stratification of age (B and C); after stratification of Davies comorbidity scores with no and intermediate comorbidity taken together versus severe comorbidity (D and E). The total number of patients included in this analysis was lower because some patients died before eGFR dropped <10 mL/min/1.73m<sup>2</sup>.
