# Supplementary material for: Value-based evaluation of dialysis versus conservative care in older patients with advanced chronic kidney disease: a cohort study
Source: Springer Nature journal article supplement (doi:10.1186/s12882-018-1004-4), 2018-08-16
Supplement: MOESM5 [file 16041428]

**ADDITIONAL FILE 5:**

**Additional Table 1.** Baseline characteristics of patients included in the assessment of HRQOL.

|                                                                      | <b>Not yet started on dialysis</b><br>(n=39) | <b>Started on dialysis</b><br>(n=34) | <b>Conservative care</b><br>(n=23) | <b>P value</b>                                                         |
|----------------------------------------------------------------------|----------------------------------------------|--------------------------------------|------------------------------------|------------------------------------------------------------------------|
| Mean (SD) age (years)                                                | 79.8 (5.1)                                   | 80.1 (3.3)                           | 83.8 (5.0)                         | 1: 0.004 <sup>a</sup><br>2: 0.001 <sup>b</sup><br>3: 0.78 <sup>c</sup> |
| Aged ≥80 years                                                       | 14 (36%)                                     | 7 (21%)                              | 15 (65%)                           | 1: 0.03<br>2: 0.11<br>3: 0.56                                          |
| Sex (female)                                                         | 12 (31%)                                     | 8 (24%)                              | 11 (48%)                           | 1: 0.18<br>2: 0.06<br>3: 0.49                                          |
| Davies comorbidity score                                             |                                              |                                      |                                    | 1: 0.85<br>2: 0.87<br>3: 0.83                                          |
| No comorbidity (score = 0)                                           | 5 (13%)                                      | 3 (9%)                               | 2 (9%)                             |                                                                        |
| Intermediate comorbidity (score = 1 or 2)                            | 23 (59%)                                     | 20 (59%)                             | 15 (65%)                           |                                                                        |
| Severe comorbidity (score ≥ 3)                                       | 11 (28%)                                     | 11 (32%)                             | 6 (26%)                            |                                                                        |
| Primary renal diagnosis                                              |                                              |                                      |                                    | 1: 0.30<br>2: 0.05<br>3: 0.20                                          |
| Renal vascular disease                                               | 15 (39%)                                     | 10 (29%)                             | 8 (35%)                            |                                                                        |
| Diabetes mellitus                                                    | 2 (5%)                                       | 5 (15%)                              | 0 (0%)                             |                                                                        |
| Hypertension                                                         | 2 (5%)                                       | 5 (15%)                              | 0 (0%)                             |                                                                        |
| Pyelonephritis                                                       | 0 (0%)                                       | 1 (3%)                               | 3 (13%)                            |                                                                        |
| Polycystic kidneys                                                   | 1 (3%)                                       | 3 (9%)                               | 1 (4%)                             |                                                                        |
| Glomerulonephritis                                                   | 1 (3%)                                       | 2 (6%)                               | 0 (0%)                             |                                                                        |
| Cause unknown                                                        | 11 (28%)                                     | 6 (18%)                              | 6 (26%)                            |                                                                        |
| Other                                                                | 7 (18%)                                      | 2 (6%)                               | 5 (22%)                            |                                                                        |
| Mean (SD) eGFR (mL/min/1.73 m <sup>2</sup> ) at HRQOL assessment     | 16.2 (5.4)                                   |                                      | 16.4 (5.6)                         | 1: 0.86                                                                |
| Median (IQR) time in years from treatment choice to HRQOL assessment | 1.1 (0.6 – 1.7)                              | 2.9 (1.0 – 5.5)                      | 1.3 (0.3 – 2.6)                    | 1: 0.62<br>2: 0.001<br>3: <0.001                                       |
| Median (IQR) time in years from dialysis start to HRQOL assessment   |                                              | 1.8 (0.5 – 4.4)                      |                                    |                                                                        |
| Interviewer-administration of KDQOL-SF™                              | 7 (18%)                                      | 18 (53%)                             | 6 (26%)                            | 1: 0.45<br>2: 0.04<br>3: 0.002                                         |

Values are numbers (percentages) unless stated otherwise.

eGFR, estimated glomerular filtration rate; HRQOL, health-related quality of life; IQR, interquartile range; SD, standard deviation.

<sup>a</sup>= Not yet started on dialysis *versus* Conservative care;

<sup>b</sup>= Started on dialysis *versus* Conservative care;

<sup>c</sup>= Not yet started on dialysis *versus* Started on dialysis.
