# Supplementary material for: Value-based evaluation of dialysis versus conservative care in older patients with advanced chronic kidney disease: a cohort study
Source: Springer Nature journal article supplement (doi:10.1186/s12882-018-1004-4), 2018-08-16
Supplement: MOESM6 [file 16041428]

**ADDITIONAL FILE 6:**

**Additional Table 2.** All KDQOL-SF™ domain scores in patients choosing dialysis but not yet started on dialysis, in patients started on dialysis, and in patients on conservative care.

|                                         | <b>Not yet started on dialysis</b><br>(n=39) | <b>Started on dialysis</b><br>(n=34) | <b>Conservative care</b><br>(n=23) | <b>P value</b>                                                         |
|-----------------------------------------|----------------------------------------------|--------------------------------------|------------------------------------|------------------------------------------------------------------------|
| <i>Generic (SF-36) domains</i>          |                                              |                                      |                                    |                                                                        |
| Physical function                       | 50.0 (30.0 – 75.0)                           | 30.0 (10.0 – 70.0)                   | 25.0 (5.0 – 45.0)                  | 1: <0.001 <sup>a</sup><br>2: 0.25 <sup>b</sup><br>3: 0.02 <sup>d</sup> |
| Role function - physical                | 50.0 (0.0 - 100.0)                           | 25.0 (0.0 - 75.0)                    | 25.0 (0.0 – 75.0)                  | 1: 0.63<br>2: 0.83<br>3: 0.41                                          |
| Bodily pain                             | 80.0 (45.0 – 100.0)                          | 73.8 (45.0 – 100.0)                  | 57.5 (32.5 – 90.0)                 | 1: 0.10<br>2: 0.06<br>3: 0.90                                          |
| General health                          | 50.0 (38.8 – 65.0)                           | 37.5 (25.0 – 60.0)                   | 35.0 (25.0 – 45.0)                 | 1: <0.005<br>2: 0.57<br>3: 0.07                                        |
| Vitality                                | 60.0 (45.0 – 80.0)                           | 57.5 (35.0 – 75.0)                   | 45.0 (25.0 – 55.0)                 | 1: <0.005<br>2: 0.03<br>3: 0.34                                        |
| Social function                         | 87.5 (75.0 – 100.0)                          | 62.5 (50.0 – 100.0)                  | 62.5 (37.5 – 87.5)                 | 1: 0.01<br>2: 0.69<br>3: 0.01                                          |
| Role function - emotional               | 100.0 (0.0 – 100.0)                          | 100.0 (0.0 – 100.0)                  | 100.0 (0.0 - 100.0)                | 1: 0.81<br>2: 0.79<br>3: 0.95                                          |
| Mental health                           | 84.0 (80.0 – 92.0)                           | 84.0 (67.0 – 92.0)                   | 76.0 (60.0 – 80.0)                 | 1: 0.001<br>2: 0.03<br>3: 0.59                                         |
| <i>Kidney disease-specific domains</i>  |                                              |                                      |                                    |                                                                        |
| Symptoms / problems                     | 86.4 (68.2 – 88.6)                           | 83.3 (70.6 – 89.6)                   | 72.6 (61.4 – 83.0)                 | 1: 0.03<br>2: 0.05<br>3: 0.81                                          |
| Effects of kidney disease on daily life | 92.9 (78.6 – 96.4)                           | 85.7 (67.9 – 96.4)                   | 82.7 (58.9 – 90.2)                 | 1: 0.03<br>2: 0.35<br>3: 0.26                                          |
| Burden of kidney disease                | 75.0 (56.3 – 93.8)                           | 43.8 (25.0 – 62.5)                   | 75.0 (56.3 – 81.3)                 | 1: 0.70<br>2: 0.001<br>3: <0.001                                       |
| Cognitive function                      | 86.7 (73.3 – 100.0)                          | 86.7 (71.7 – 93.3)                   | 73.3 (60.0 – 86.7)                 | 1: 0.01<br>2: 0.09<br>3: 0.33                                          |
| Quality of social interaction           | 93.3 (80.0 – 100.0)                          | 93.3 (78.3 – 100.0)                  | 80.0 (66.7 – 93.3)                 | 1: 0.03<br>2: 0.04<br>3: 0.78                                          |
| Sleep                                   | 70.0 (61.9 – 80.6)                           | 66.3 (58.8 – 80.6)                   | 65.0 (47.5 – 75.0)                 | 1: 0.19<br>2: 0.66<br>3: 0.41                                          |
| Social support                          | 100.0 (83.3 – 100.0)                         | 100.0 (79.2 – 100.0)                 | 83.3 (66.7 – 100.0)                | 1: 0.53<br>2: 0.29<br>3: 0.52                                          |

Values are presented as median (interquartile range). Higher scores (0-100) indicate better quality of life.

<sup>a</sup> = Not yet started on dialysis *versus* Conservative care; <sup>b</sup> = Started on dialysis *versus* Conservative care;

<sup>c</sup> = Not yet started on dialysis *versus* Started on dialysis.
